# Supplementary material
Source: PubMed Central journal article supplement (PMC1474802)
Supplement: mbc_E05-07-0659_1.pdf [file mbc_E05-07-0659_1.pdf]

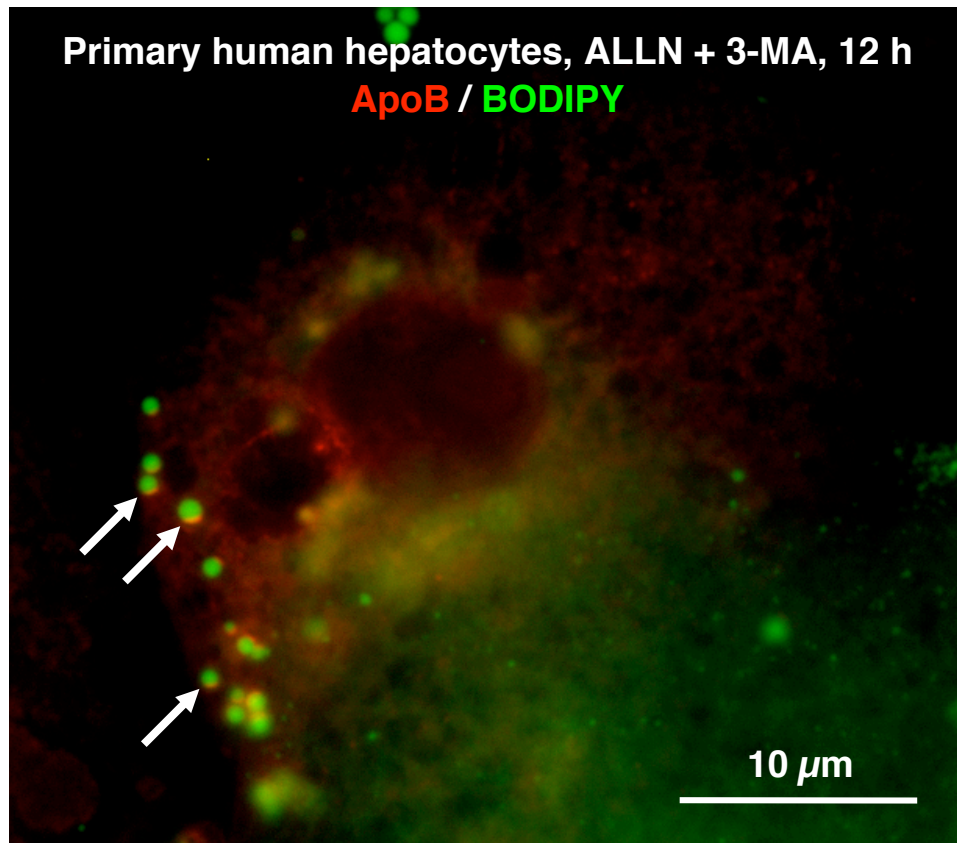

**Supplementary Figure 1.** Primary human hepatocytes were cultured on collagen-coated glass slides, treated by 10  $\mu$ M ALLN and 10 mM 3-MA for 12 h, and labeled for ApoB (red) and neutral lipids (green). The hepatocyte showed ApoB-crescents (arrows) that appeared to be identical to those found in Huh7 and HepG2 cells, but their frequency was low. Bar, 10  $\mu$ m.
