# Supplementary material
Source: PubMed Central journal article supplement (PMC1474802)
Supplement: mbc_E05-07-0659_2.pdf [file mbc_E05-07-0659_2.pdf]

### ApoB-crescent-positive cells

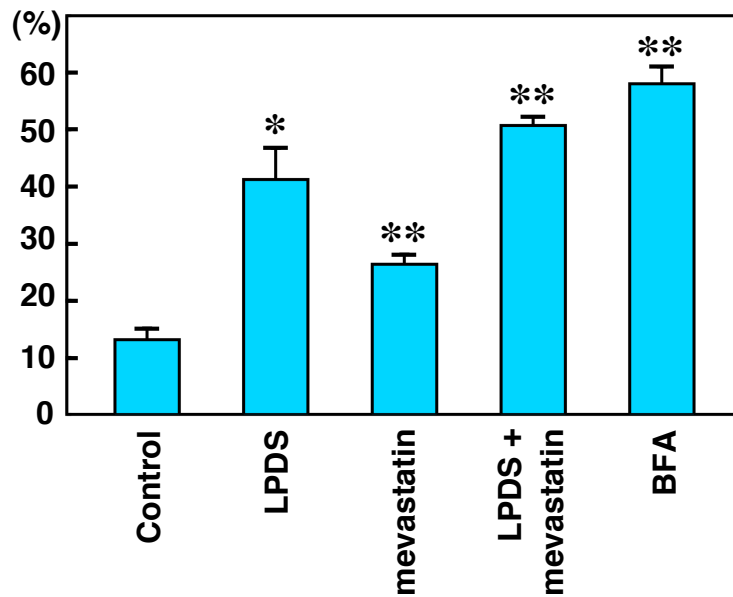

**Supplementary Figure 2.** Huh7 cells were cultured in the following conditions for 6 h and the percentage of cells showing ApoB-crescents were counted. The conditions examined are: control (10% FCS), 10% LPDS, 50  $\mu$ M mevastatin/50  $\mu$ M mevalonolactone, 10% LPDS plus 50  $\mu$ M mevastatin/50  $\mu$ M mevalonolactone, and 5  $\mu$ g/ml brefeldin A. In comparison to the control, all treatments increased ApoB-crescents significantly. Results of three independent experiments were averaged; statistical significance was examined by Student's *t*-test (\*  $p < 0.05$ , \*\*  $p < 0.01$ ).
