# Supplementary material
Source: PubMed Central journal article supplement (PMC1474802)
Supplement: mbc_E05-07-0659_3.pdf [file mbc_E05-07-0659_3.pdf]

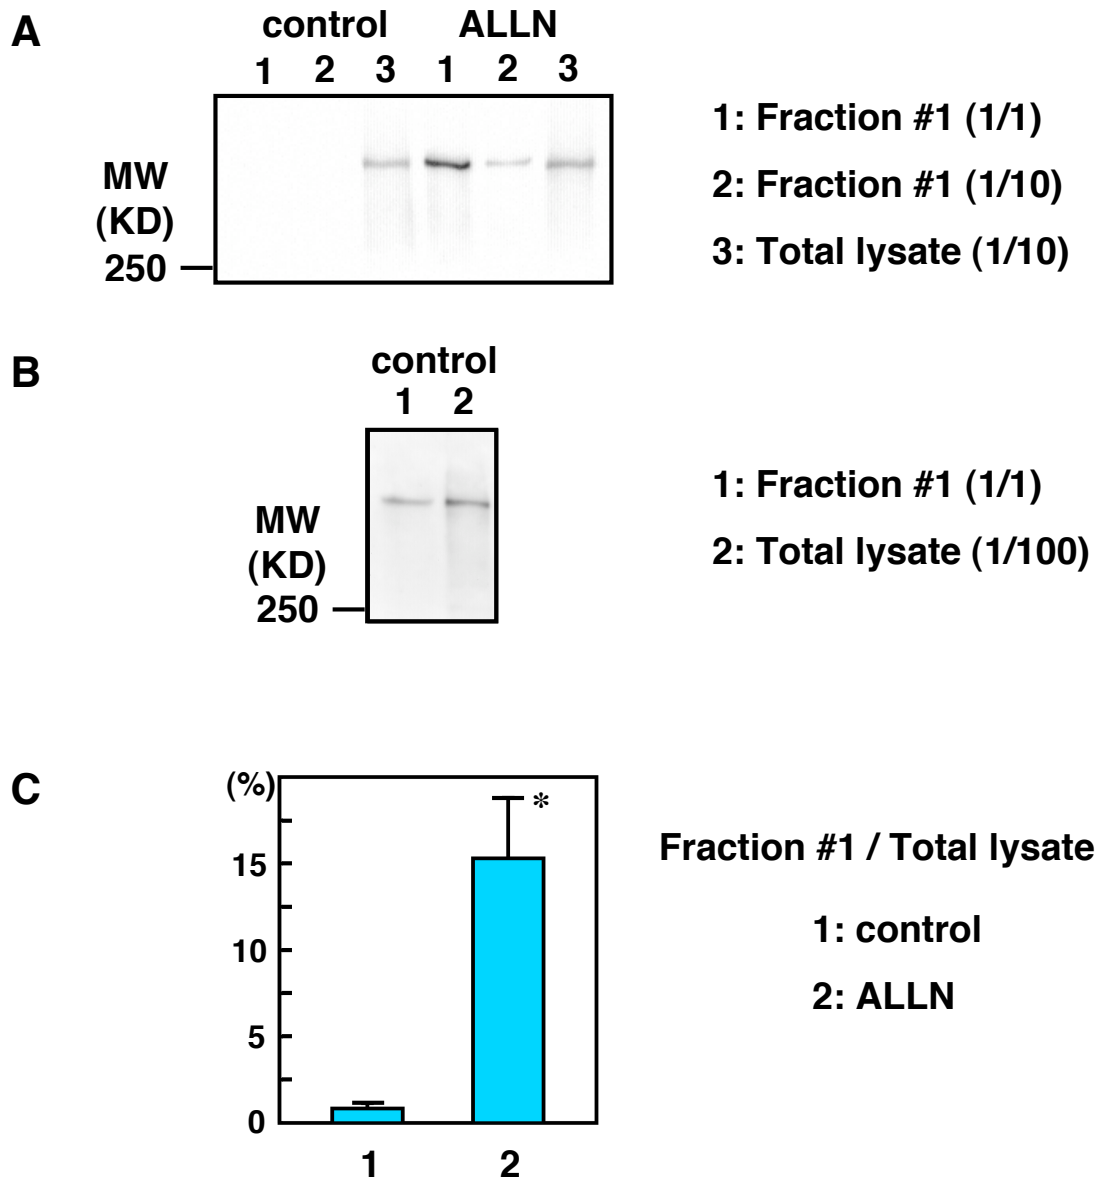

**Supplementary Figure 3.** Samples from the same starting material were subjected to Western blotting analysis, and the relative amount of ApoB was estimated to quantitate the proportion of ApoB in the fraction #1 (or CLD fraction) to the total lysate. The total lysate was electrophoresed in 1/1, 1/10 or 1/100 of the equivalent to make the reaction intensity in the same range as the fraction #1. (A, B) ApoB in the fraction #1 increased drastically by ALLN treatment; its reaction intensity was between the 1/1 and 1/10 dilution of the total lysate. The control fraction #1 showed a weaker reaction than the 1/100 dilution of the total lysate. (C) The relative reaction intensity of fraction #1 to the total lysate was 0.84 ± 0.30% in the control to 15.29 ± 3.52% in the ALLN-treated cell ( $n = 3$ ;  $*p < 0.005$ ).
