# Supplementary material
Source: PubMed Central journal article supplement (PMC1474802)
Supplement: mbc_E05-07-0659_4.pdf [file mbc_E05-07-0659_4.pdf]

## 20S proteasome activity

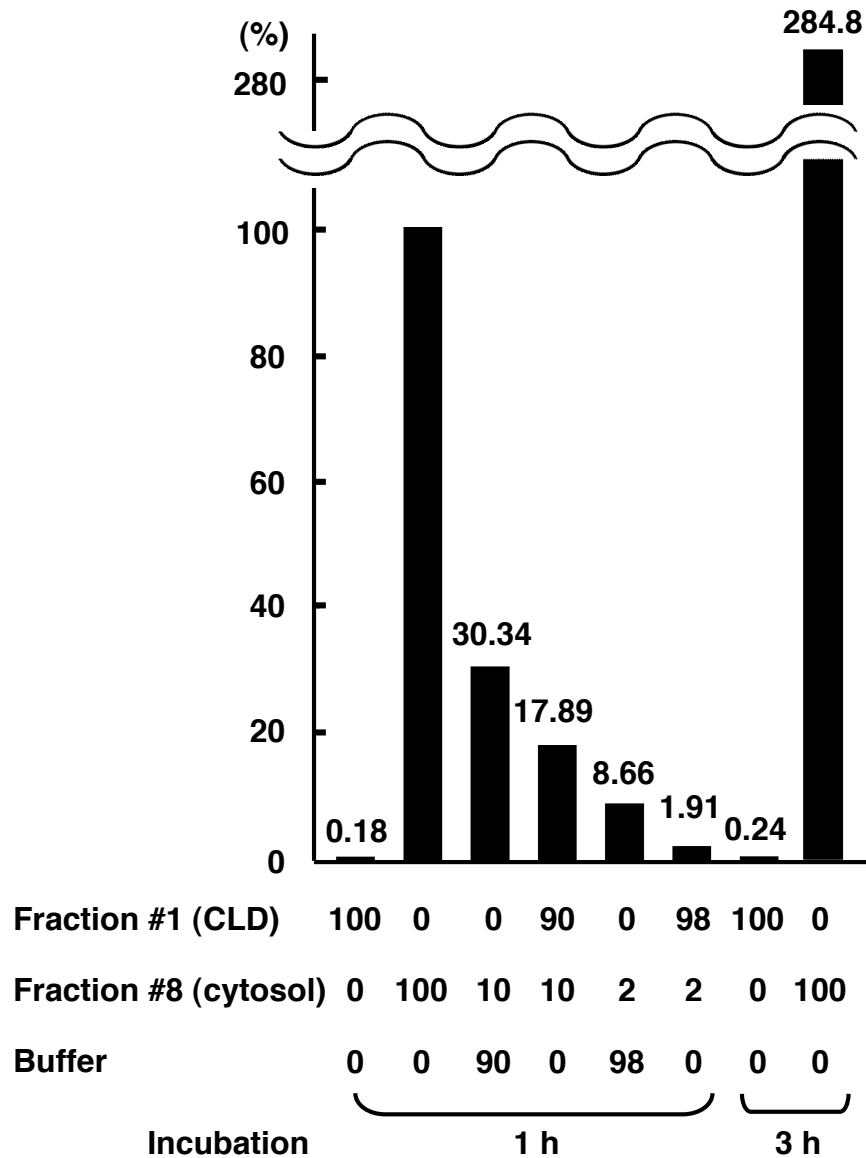

**Supplementary Figure 4.** The 20S proteasome activity was measured using 100  $\mu$ M N-succinyl-Leu-Leu-Val-Tyr-7-amino 4-methylcoumarin as the substrate. The reaction mixtures (100  $\mu$ l) were incubated for 1 h or 3 h at 37°C, and fluorescence intensity was measured using an excitation wavelength of 355 nm and an emission wavelength of 460 nm. Relative activities are shown (fraction #8 at 1 h = 100%). The proteasomal activity of the cytosolic fraction was significantly lowered by mixing with the CLD fraction instead of a buffer solution.
