# Supplementary material
Source: PubMed Central journal article supplement (PMC1474802)
Supplement: mbc_E05-07-0659_5.pdf [file mbc_E05-07-0659_5.pdf]

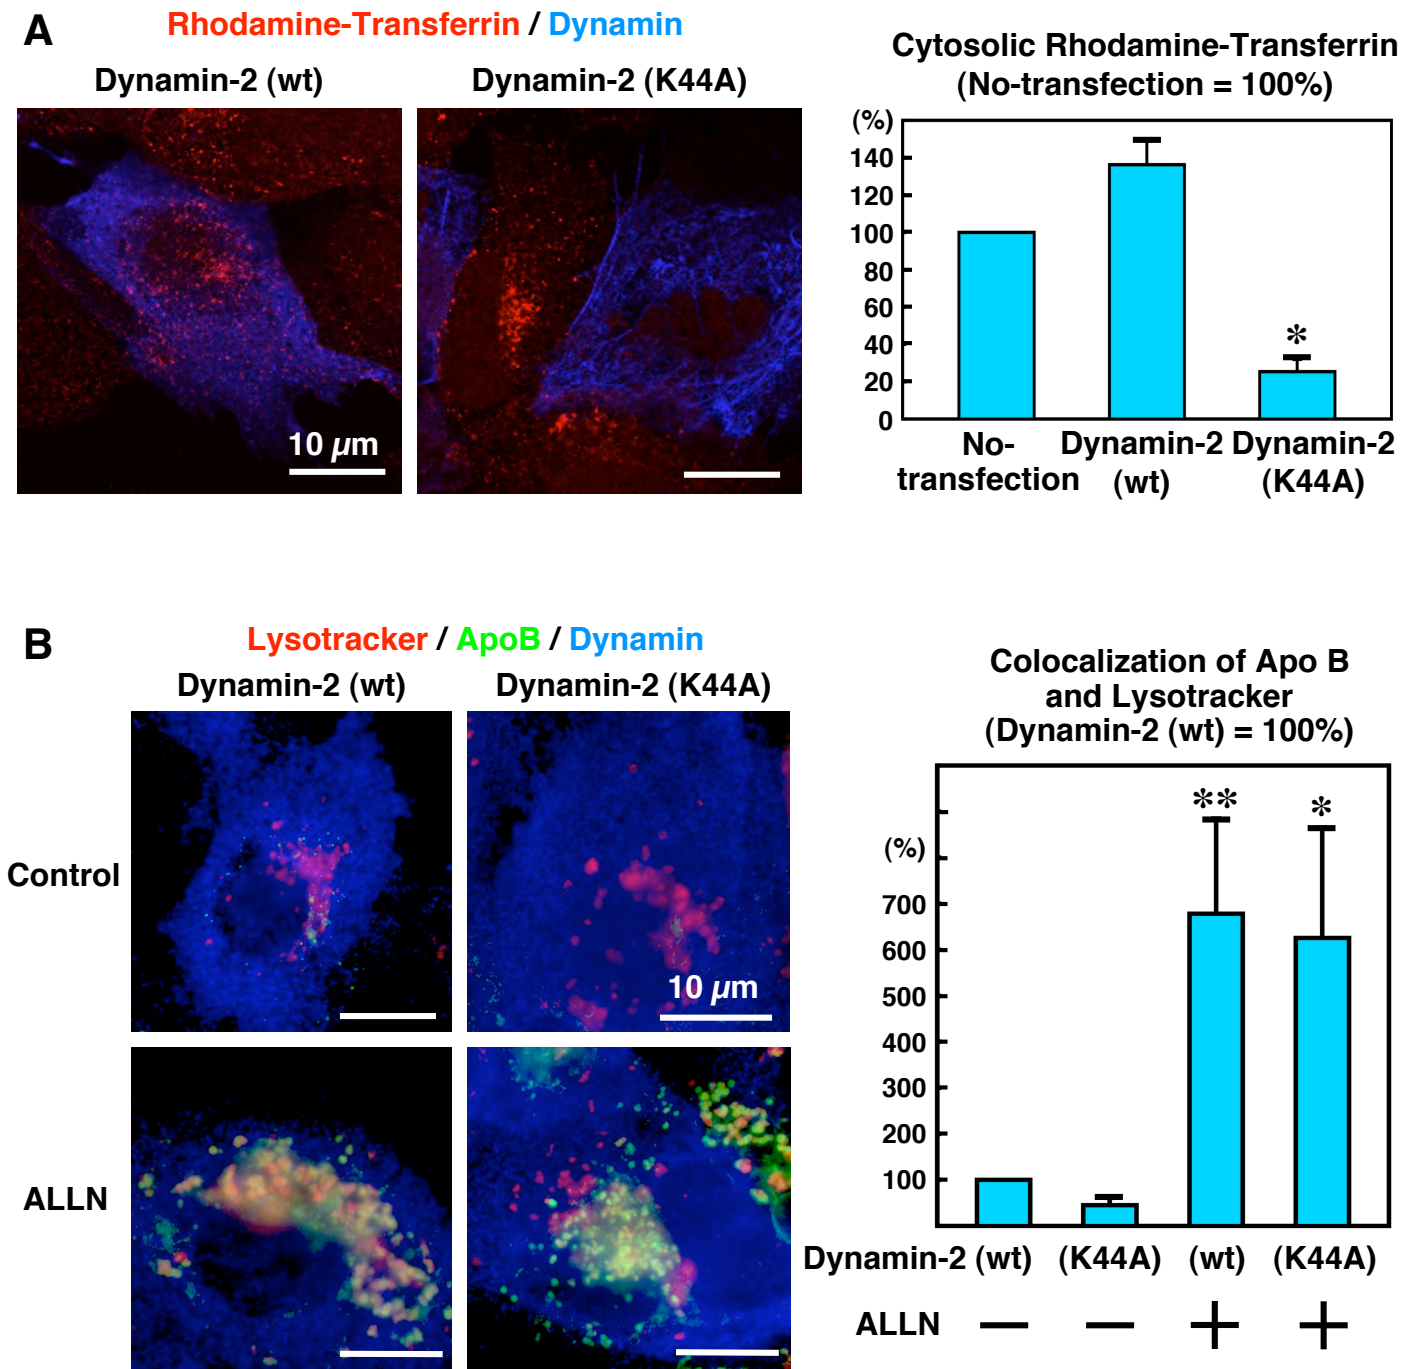

**Supplementary Figure 5.** Huh7 cells were transfected with either wild-type dynamin-2 (wt) cDNA or dominant-negative dynamin-2 mutant (K44A) cDNA, and examined 2 days later. For quantitation, results of three independent experiments were averaged, and statistical significance was examined using Student's *t*-test. (A) Uptake of rhodamine-transferrin (Sigma) was reduced significantly in cells expressing the K44A mutant in comparison to cells expressing wild-type dynamin-2. Quantitation was done by measuring the intensity of rhodamine fluorescence in transfected cells ( $n = 3$ ;  $*p < 0.05$ ). (B) In contrast, colocalization of ApoB and LysoTracker after 12 h of ALLN treatment was observed similarly in cells transfected with wt and K44A cDNA. Quantitation confirmed that ApoB colocalizing with LysoTracker increased significantly by ALLN treatment, even in cells transfected with the K44A cDNA ( $n = 3$ ;  $* p < 0.05$ ,  $** p < 0.01$ ); colocalization showed no statistical difference between cells expressing wt and K44A dynamin-2.
