# Supplementary material
Source: PubMed Central journal article supplement (PMC1474802)
Supplement: mbc_E05-07-0659_6.pdf [file mbc_E05-07-0659_6.pdf]

### LC3-positive autophagosomes

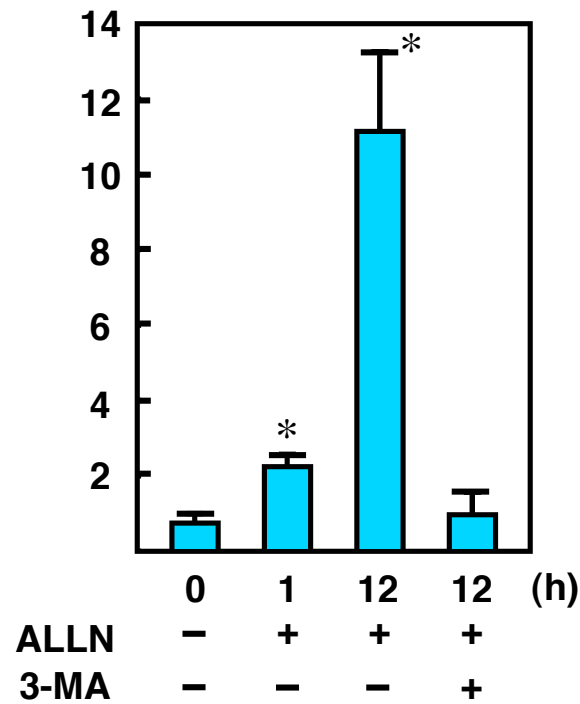

**Supplementary Figure 6.** The LC3 labeling started to increase as early as 1 h after ALLN was given. The number of LC3-positive particles per cell was quantitated in Huh7 cells treated with 10  $\mu$ M ALLN for 0 h, 1 h, 12 h, or with 10  $\mu$ M ALLN and 10 mM 3-MA for 12 h. Results of three independent experiments were averaged, and statistical significance was examined using Student's *t*-test. ( $n = 3$ ;  $*p < 0.01$ )
